# Supplementary material
Source: PubMed Central journal article supplement (PMC3697256)
Supplement: JB.02298-12_zjb999092631so1.pdf [file JB.02298-12_zjb999092631so1.pdf]

## SUPPLEMENTAL MATERIAL

### BIOCHEMICAL AND STRUCTURAL STUDIES ON THE M. TUBERCULOSIS O<sup>6</sup>-METHYLGUANINE METHYLTRANSFERASE AND MUTATED VARIANTS

Riccardo Miggiano<sup>1§</sup>, Valentina Casazza<sup>1§</sup>, Silvia Garavaglia<sup>1</sup>, Maria Ciaramella<sup>2</sup>,  
Giuseppe Perugino<sup>2</sup>, Menico Rizzi<sup>1\*</sup> and Franca Rossi<sup>1\*</sup>

#### S-1 SUPPLEMENTAL METHODS

#### S-2 TABLE S1

#### S-3 FIGURE S1

#### S-4 FIGURE S2

#### S-5 FIGURE S3

#### S-6 FIGURE S4

#### S-7 FIGURE S5

#### SUPPLEMENTAL METHODS

*Expression and purification of wild-type MtOGT and point mutants* - The three recombinant proteins *MtOGT*, *MtOGT-T15S* and *MtOGT-R37L* were purified by FPLC (Akta Basic Instrument GE Healthcare) from 1 L of the corresponding auto-induced bacterial culture adopting the following workflow. 50 mL of clarified lysate in buffer A [Tris-HCl 20mM pH 7.8 and a commercial protease inhibitor cocktail (Sigma)] were loaded onto a HiTrapQ pre-packed anion exchange column. The retained proteins were then eluted using a linear 0-0.5 M NaCl gradient. Recombinant protein-containing fractions were dialysed against buffer A, applied onto a MonoQ pre-packed column (GE Healthcare) and protein elution was obtained as above. Recombinant protein-containing fractions from the last anion-exchange chromatography step were pooled, desalted by dialysis against buffer A and loaded onto a HiTrap Heparin disposable column (GE Healthcare). Protein elution was obtained by a linear 0-1.0 M NaCl gradient and the eluted fractions containing the recombinant protein were pooled, concentrated to 1 mg/mL by using 10 kDa NMWCO ultrafiltration device (Vivaspin, Vivascience) and loaded onto a Superdex 200 10/300 size exclusion chromatography column (GE Healthcare) using buffer B [20 mM Tris-HCl pH 7.8, 150 mM NaCl] as the mobile phase. Fractions corresponding to the main peak were concentrated to 5 mg/mL by using a 10 kDa NMWCO Vivaspin device. During the entire procedure the recombinant protein was monitored by standard SDS/PAGE analyses (example given in Supplementary Figure 1) and protein concentration was determined by the Bradford assay (Sigma). If not immediately used, the purified proteins were stored in aliquots at -80 °C.

**Table S1 - Oligonucleotides used in the present work**

|                                        |                                                                   |
|----------------------------------------|-------------------------------------------------------------------|
| <b>MtOGTfwd</b> <sup>(a)</sup>         | 5'-ATAT <u>CCATGGT</u> TTCACTACCGCACCATCGATAGC-3' ( <i>Nco</i> I) |
| <b>MtOGTrev</b> <sup>(a)</sup>         | 5'-AAAG <u>GATCCT</u> CAGTCGAAGAGCGTCAAGTCTG-3' ( <i>Bam</i> HI)  |
|                                        |                                                                   |
| <b>T15S fwd</b> <sup>(b)</sup>         | 5'-CCCATCGGGCCATTA <b>AGC</b> CTGGCCGGGCATGGC-3' ACC              |
| <b>T15S rev</b>                        | 5'-GCCATGCCCCGGCCAGGCTTAATGGCCCGATGGG-3'                          |
|                                        |                                                                   |
| <b>R37L fwd</b> <sup>(c)</sup>         | 5'-CGTATGAGCCAAGC <b>CTC</b> ACACACTGGACACCC-3' CGC               |
| <b>R37L rev</b>                        | 5'-GGGTGTCCAGTGTGTGAGGCTTGGCTCATACG-3'                            |
|                                        |                                                                   |
| <b>UP<sup>met</sup></b> <sup>(d)</sup> | 5'-GGACACTGTACGTTAAGGCG*ATCGAATTAGGATTAA-3'                       |
| <b>DOWN</b> <sup>(d)</sup>             | 5'-GGTTAATCCTAATTCGATCGCCTTAACGTACAGTGT-3'                        |
|                                        |                                                                   |
| <b>A<sup>+</sup></b> <sup>(e)</sup>    | 5'- <b>TMR</b> -GCAACAACGTTGCGCAAACCTATTAACCTGGCGAACTACTTA-3'     |
| <b>D<sup>-</sup></b> <sup>(e)</sup>    | 5'-TAAGTAGTTCGCCAGTTAATAGTTTTCGCAACGTTGTTGC-3'                    |

<sup>(a)</sup> Restriction sites for the endonucleases indicated in brackets are underlined; <sup>(b)</sup> <sup>(c)</sup> point-mutation in each oligonucleotide appears in bold; <sup>(d)</sup> the methylguanine residue in the UP<sup>met</sup> oligonucleotide is labeled by an asterisk; the ds-DNA<sup>met</sup> probe used in enzyme kinetics analysis has been prepared by annealing UP<sup>met</sup> and DOWN oligonucleotides; <sup>(e)</sup> “TMR” indicates the TAMRA<sup>TM</sup> fluorescent group; the dsDNA probe used in EMSA analysis has been prepared by annealing A<sup>+</sup> and D<sup>-</sup> oligonucleotides.

**Fig. S1**

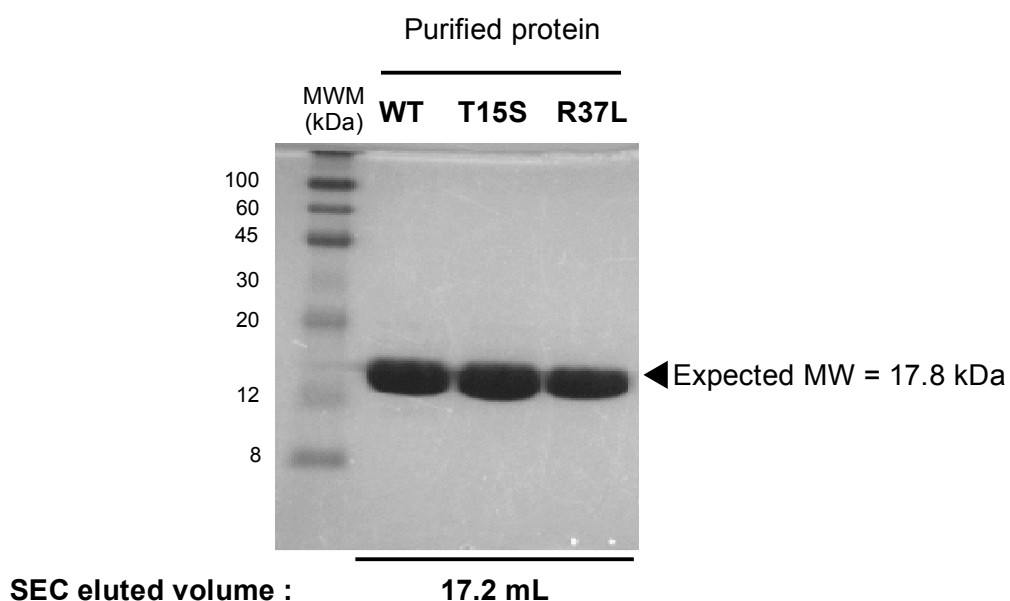

**Purification of *MtOGT*, *MtOGT-T15S* and *MtOGT-R37L*** - 4  $\mu$ L of each purified protein (5 mg/mL) were separated using a 15% acrylamide-bisacrylamide gel in SDS-PAGE and visualized by Coomassie brilliant blue staining. The three proteins, independently loaded onto a Superdex 200 10/300 size exclusion chromatography column (GE Healthcare), invariably eluted at  $V_e=17.2$  mL, which corresponds to a MW of 18 kDa, as calculated on the basis of the calibration curve of the column.

**Fig. S2**

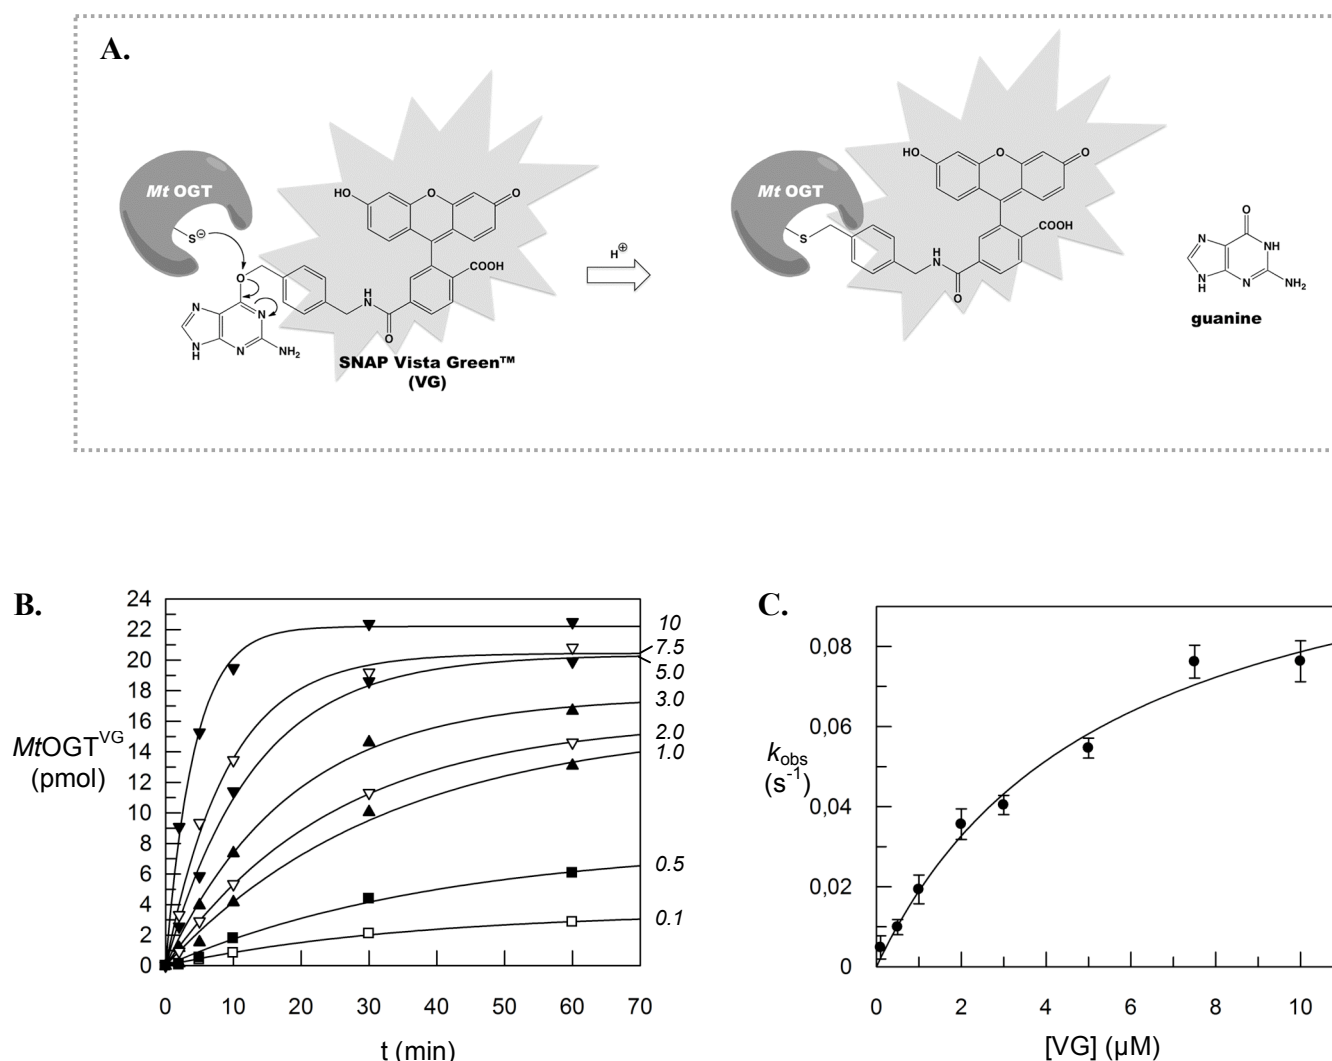

**Example of the determination of the kinetic constants of the reaction catalyzed by the recombinant proteins under study.** **A.** Scheme of the assay with the fluorescent substrate/inhibitor SNAP-Vista Green™ (VG); **B.** Time-course experiments of covalent modification of 5  $\mu\text{M}$  *MtOGT* incubated with VG in the range of 0.1-10  $\mu\text{M}$  (VG concentration appears at the right of each corresponding curve) and taking aliquots at 0, 2, 5, 10, 30, 60 min. Similar sets of measurements were carried out for both the *MtOGT*-T15S and *MtOGT*-R37L mutated proteins (not shown); **C.** Plot of the first-order rate constants for covalent modification of *MtOGT* ( $k_{\text{obs}}$ ) as a function of SNAP-Vista Green™ (VG) concentration. Rate values obtained in the time course experiments were fitted according to equation 1 (see the “Materials and Methods” section of the main text).

**Fig. S3**

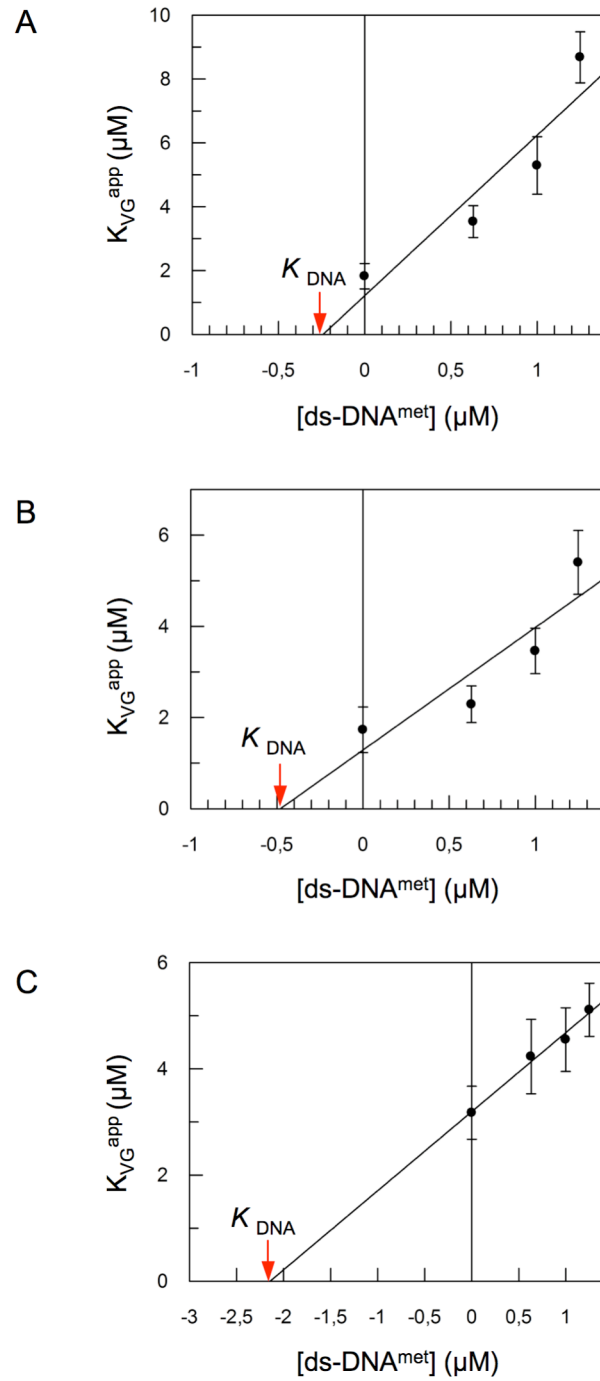

**Determination of the DNA dissociation constants of the reaction catalyzed by *MtOGT*, *MtOGT*-T15S and *MtOGT*-R37L** - Plots of the variation of  $K_{VG}$  of *MtOGT* (A), *MtOGT*-T15S (B) and *MtOGT*-R37L (C) as a function of the ds-DNA<sup>met</sup> concentration. Data were fitted according to equation 2 (see the “Materials and Methods” section of the main text) that allowed the calculation of the dissociation constant of each enzyme for the ds-DNA<sup>met</sup> ligand ( $K_{DNA}$ ), indicated by a red arrow in each panel.

Fig. S4

|       |       |                |              |                |            |             |                         |
|-------|-------|----------------|--------------|----------------|------------|-------------|-------------------------|
|       |       | 15             |              | 37             |            |             |                         |
| MTB   | ----- | MIHYRTIDSPIGPL | TLAGHGSVLTNL | RMLEQTY-----   | EPSRTH     | WTPDPGA     | FS                      |
| SULFO | ----- | MIVYGLYKSPFGP  | ITVAKNEKGFV  | MLDFCDCAE----- | RSS-----   | LDNDYFD     |                         |
| ECOLI | MTAKQ | FRHGGENLAVRY   | ALADCELGRCL  | VAESERGICAIL   | LGD        | DATLISELQQM | FPAADNAPADLMFQ          |
| PYRO  | ----- | MLSVEKFRVGER   | VWIGVIFSGRV  | QGI            | AFAFDRGTLM | KRIHDLAEHLG | KRGVVISLSDV             |
| METJ  | ----- | MIIQIEEYFIGM   | IFKGNQLVRNT  | IPLRREEIFNF    | MDG-----   | EVVSNPED    |                         |
| HUM   | ----- | MDKDCEMKRRT    | TLDSPLGKLEL  | SGCEQGLHEIK    | LL         | GKGT        | S-AADAVEVPAPAAVLGGPEPLM |
|       |       | :              | :            | :              |            |             |                         |

**B.**

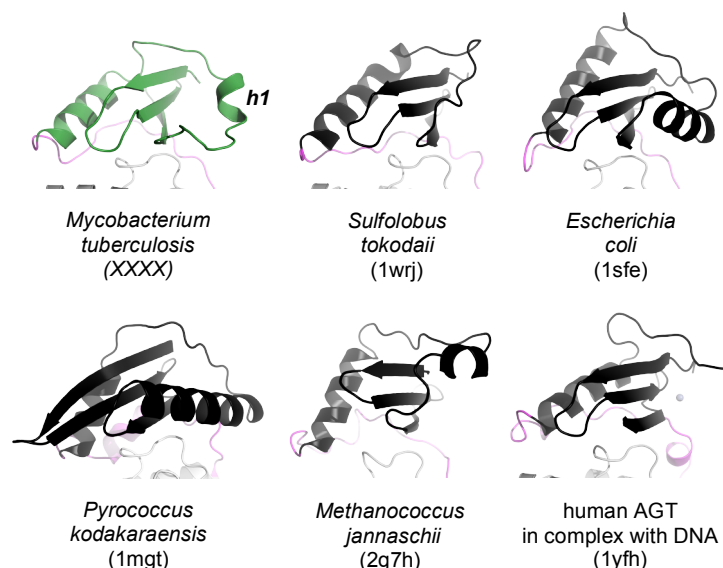

**Structural comparison of *Mt*OGT with OGTs from different species - A.** The figure shows the primary ClustalW-generated sequence alignment of equivalent moieties of the N-terminal domains of OGTs whose structures have been deposited with the protein data bank. **MTB:** *Mycobacterium tuberculosis*; **SULFO:** *Sulfolobus tokodaii*; **ECOLI:** *Escherichia coli*; **PYRO:** *Pyrococcus kodakaraensis*; **METJ:** *Methanococcus jannaschii*; **HUM:** human AGT. The random-coiled region in *M. tuberculosis* OGT is highlighted in green and residues belonging to the h1 helical turn are boxed. The red arrowheads label the residues mutated in *Mt*OGT-T15S and *Mt*OGT-R37L, respectively. Residues rendered in red in the human sequence are not visible in the human AGT structures. **B.** Cartoons of the indicated structures after optimal superposition to the *Mt*OGT model; each panel shows only the N-terminal domain (depicted in green in *Mt*OGT and in black in all other structures) and part of the inter-domain connecting loop (invariably colored in magenta).

**Fig. S5**

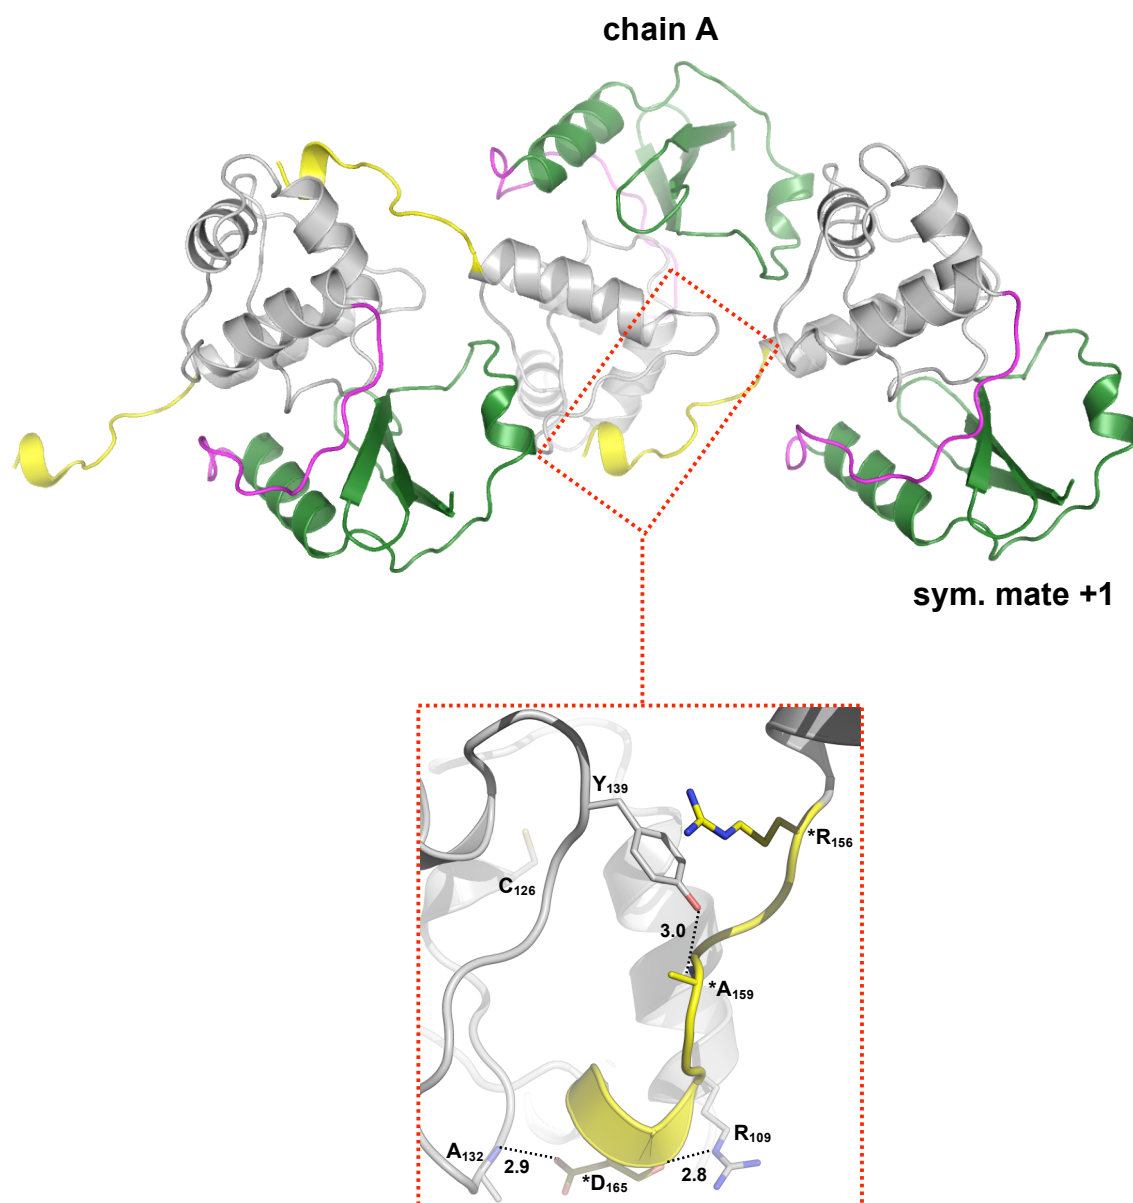

**Crystal packing of *MtOGT*** - Close up view of the interacting regions of the C-terminal domain of one chain (gray) and the tail of its symmetry mate (yellow, residues labeled by an asterisk) as observed in the *MtOGT* crystal lattice (upper image); only the residues involved in the closest interactions are labeled and shown as sticks; bond distances (Å) are indicated as dotted lines.
